# Supplementary material for: Shape-controlled synthesis of Prussian blue analogue Co3[Co(CN)6]2 nanocrystals
Source: Royal Society of Chemistry journal article supplement (doi:10.1039/b500153f), 2005-01-01

*Electronic Supplementary Information for*  
**Shape-controlled synthesis of Prussian blue analogue  $\text{Co}_3[\text{Co}(\text{CN})_2$   
nanocrystals**

Minhua Cao,<sup>a</sup> Xinglong Wu,<sup>a</sup> Xiaoyan He<sup>a</sup> and Changwen Hu<sup>\*ab</sup>

<sup>a</sup>Institute of Polyoxometalate Chemistry, Northeast Normal University,  
Changchun, P. R.. China 130024. E-mail: huchw@nenu.edu.cn

<sup>b</sup>The Institute for Chemical Physics and the Department of Chemistry,  
Beijing Institute of Technology, Beijing, P. R. China 100081

**Fig. S1** (a and b) SEM images of samples synthesized under the conditions same as in Figure 2, except that the reaction temperature was increased to 160 and 180 °C, respectively.

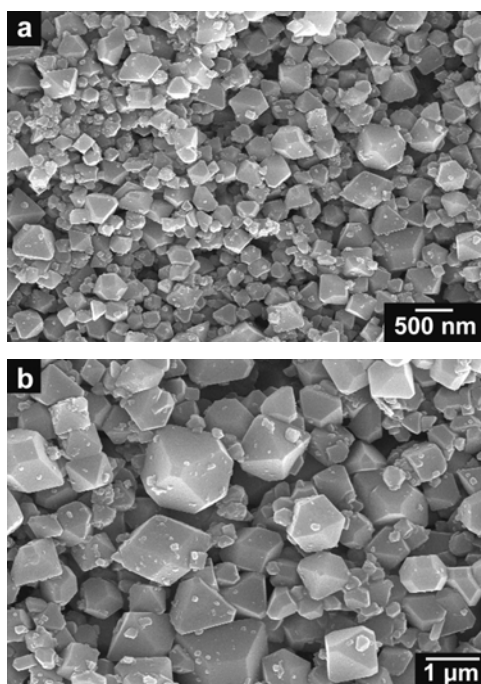

Supplement: b500153f.pdf [file b500153f.pdf]
